# Supplementary material for: Estimating National-Level Exposure to Antineoplastic Agents in the Workplace: CAREX Canada Findings and Future Research Needs
Source: PubMed Central journal article supplement — Ann Work Expo Health. 2017 Jun 8;61(6):656–8. doi: 10.1093/annweh/wxx042 (PMC6824530; doi:10.1093/annweh/wxx042), 2017-06-08
Supplement: wxx042_suppl_supplementary_material.pdf [file wxx042_suppl_supplementary_material.pdf]

## SUPPLEMENTARY FIGURE 1: Information sources, methods, and exclusions for CAREX Canada exposure prevalence estimates (antineoplastic agents)

| Occupation / Location                                                                                | STEP 1                                                                                                                                                    |                           | STEP 2                                                                                                                                                                                                                    |                           | STEP 3                                    |                                    | ADDITIONAL INFORMATION             |                                                                                                                               |
|------------------------------------------------------------------------------------------------------|-----------------------------------------------------------------------------------------------------------------------------------------------------------|---------------------------|---------------------------------------------------------------------------------------------------------------------------------------------------------------------------------------------------------------------------|---------------------------|-------------------------------------------|------------------------------------|------------------------------------|-------------------------------------------------------------------------------------------------------------------------------|
|                                                                                                      | Baseline Population Description                                                                                                                           | CAREX Baseline Population | CAREX Exposure Prevalence Rationale                                                                                                                                                                                       | CAREX Exposure Prevalence | Baseline Population x Exposure Prevalence | CAREX Numbers Exposed <sup>1</sup> | Information Source, Sex Breakdowns | Exclusions <sup>2</sup>                                                                                                       |
| <b>PHARMACISTS</b><br>IN COMMUNITY                                                                   | All community pharmacists in Canada (sum of registered pharmacists in each province/territory) <b>(A,B)</b>                                               | 23,700                    | 61% <b>(1)</b> and 63.7% <b>(2)</b> of responding pharmacies report weekly dispensation of 1 or more chemotherapy prescriptions                                                                                           | 60%                       | 23,700x60%                                | 14,200                             | <b>L</b>                           | Assisting occupations in pharmacy settings (assistants, student interns, administrative staff)                                |
| <b>PHARMACY TECHNICIANS</b><br>IN COMMUNITY                                                          | All pharmacy technicians in Canada (extrapolation based on reported staffing ratios: 1.12 pharmacy technicians per 1 pharmacist) <b>(D)</b>               | 26,000                    |                                                                                                                                                                                                                           | 60%                       | 26,000x60%                                | 16,000                             | <b>D</b>                           |                                                                                                                               |
| <b>PHARMACISTS</b><br>IN HOSPITALS                                                                   | All pharmacists employed in hospitals <b>(A,B)</b>                                                                                                        | 6,800                     | 89% of hospital respondents report preparation of IV cytotoxic drugs in their pharmacy department <b>(3)</b><br>Surface contamination is likely common in pharmacies preparing antineoplastic agents <b>(4)</b>           | 85%                       | 6,800x0.85%                               | 5,800                              | <b>L</b>                           |                                                                                                                               |
| <b>PHARMACY TECHNICIANS</b><br>IN HOSPITALS                                                          | All pharmacy technicians employed in hospitals (extrapolation based on reported staffing ratios: 1.20 pharmacy technicians per 1 pharmacist) <b>(C,D)</b> | 8,100                     |                                                                                                                                                                                                                           | 85%                       | 8,100x0.85%                               | 6,900                              | <b>D</b>                           |                                                                                                                               |
| <b>REGISTERED NURSES (RNs) AND LICENSED PRACTICAL NURSES (LPNs)</b><br>IN HOSPITALS                  | All direct care nurses <b>(E,F)</b> in:                                                                                                                   |                           | Estimates proportion of nurses in each clinical area with potential exposure to antineoplastic agents <b>(5,6)</b> :                                                                                                      |                           |                                           |                                    | <b>E,F</b>                         | Nurse practitioners and nurses in areas where antineoplastic agents may be used infrequently, e.g., emergency, operating room |
|                                                                                                      | Oncology                                                                                                                                                  | 7,000                     | Oncology: 75.6%                                                                                                                                                                                                           | 75%                       | 7,000x75%                                 | 5,300                              |                                    |                                                                                                                               |
|                                                                                                      | Ambulatory                                                                                                                                                | 10,300                    | Ambulatory: 27.3%                                                                                                                                                                                                         | 27%                       | 10,300x27%                                | 2,800                              |                                    |                                                                                                                               |
|                                                                                                      | Medical/Surgical                                                                                                                                          | 59,000                    | Medical/Surgical: 18.3%                                                                                                                                                                                                   | 18%                       | 59,000x18%                                | 10,600                             |                                    |                                                                                                                               |
| <b>REGISTERED NURSES (RNs) AND LICENSED PRACTICAL NURSES (LPNs)</b><br>IN GERIATRIC / LONG TERM CARE | All direct care nurses <b>(E,F)</b> in: Geriatric/Long-Term Care                                                                                          | 65,000                    | 1.8% of individuals in hospital continuing care and <1% in residential care receive chemotherapy <b>(7)</b>                                                                                                               | 1%                        | 65,000x1%                                 | 700                                |                                    |                                                                                                                               |
| <b>VETERINARIANS</b><br>IN COMMUNITY                                                                 | All veterinarians employed in small animal practice <b>(G)</b> <sup>3</sup>                                                                               | 6,900                     | Antineoplastic agents most commonly used to treat companion animals <b>(8)</b>                                                                                                                                            | 40%                       | 6,900x40%                                 | 2,800                              | <b>G</b>                           | Assisting occupations in veterinary settings (assistants, student interns, administrative staff)                              |
|                                                                                                      | All veterinarians employed in mixed (small and large) animal practice <b>(G)</b> <sup>3</sup>                                                             | 1,000                     |                                                                                                                                                                                                                           | 20%                       | 1000x20%                                  | 200                                |                                    |                                                                                                                               |
| <b>VETERINARY TECHNICIANS</b><br>IN COMMUNITY                                                        | All veterinary technicians employed in small animal practice: extrapolated from veterinarian numbers <b>(H,I)</b>                                         | 5,500                     | Surface contamination has been detected in both the US <b>(9)</b> and The Netherlands <b>(10)</b><br>Prevalence of antineoplastic agent use in veterinary practice ranges from 46% <b>(11,12)</b> up to 70.8% <b>(13)</b> | 40%                       | 5,500x40%                                 | 2,200                              | <b>J</b>                           |                                                                                                                               |
|                                                                                                      | All veterinary technicians employed in mixed (small and large) animal practice: extrapolated from veterinarian numbers <b>(H,I)</b>                       | 800                       |                                                                                                                                                                                                                           | 20%                       | 800x20%                                   | 200                                |                                    |                                                                                                                               |

| Occupation / Location                                                                                   | STEP 1                                                                                                                                                    |                           | STEP 2                                                                                                                                                                                                                                                                                                               |                                                                                                                         | STEP 3                                    |                                    | ADDITIONAL INFORMATION             |                                                                                                                                  |
|---------------------------------------------------------------------------------------------------------|-----------------------------------------------------------------------------------------------------------------------------------------------------------|---------------------------|----------------------------------------------------------------------------------------------------------------------------------------------------------------------------------------------------------------------------------------------------------------------------------------------------------------------|-------------------------------------------------------------------------------------------------------------------------|-------------------------------------------|------------------------------------|------------------------------------|----------------------------------------------------------------------------------------------------------------------------------|
|                                                                                                         | Baseline Population Description                                                                                                                           | CAREX Baseline Population | CAREX Exposure Prevalence Rationale                                                                                                                                                                                                                                                                                  | CAREX Exposure Prevalence                                                                                               | Baseline Population x Exposure Prevalence | CAREX Numbers Exposed <sup>1</sup> | Information Source, Sex Breakdowns | Exclusions <sup>2</sup>                                                                                                          |
| <b>CLEANING WORKERS</b><br>IN HOSPITALS                                                                 | All cleaning workers (NOC-S G931) in hospitals (NAICS 6220) and in nursing and residential care facilities (NAICS 6230) <b>(J)</b>                        | 19,600                    | -20% of cleaning workers employed by hospitals in the province of British Columbia have physical contact with inpatient or outpatient oncology units <b>(14)</b>                                                                                                                                                     | 15%                                                                                                                     | 19,600x15%                                | 2,900                              | <b>J</b>                           | Subcontracted cleaners                                                                                                           |
| <b>CLEANING WORKERS</b><br>IN GERIATRIC / LONG TERM CARE                                                |                                                                                                                                                           | 14,800                    |                                                                                                                                                                                                                                                                                                                      | 1%                                                                                                                      | 14,800x0.01                               | 100                                |                                    |                                                                                                                                  |
| <b>HOME CARE WORKERS (HOME SUPPORT WORKERS AND NURSE AIDES)</b><br>IN COMMUNITY                         | All nurse aides (NOC-S D312) in home health services (NAICS 6216) <b>(J)</b>                                                                              | 3,600                     | Support workers and nurse aides mostly assist clients with basic activities; licensed nurses (RNs and LPNs) most frequently report administering medications <b>(15)</b><br><br>Antineoplastic agent contamination has been noted in home settings of individuals receiving chemotherapy treatment <b>(10,16,17)</b> | 5%                                                                                                                      | 3,600x5%                                  | 200                                | <b>M</b>                           | Case managers, respiratory therapists, dietitians, physicians, other para/professional groups                                    |
|                                                                                                         | All home support workers (NOC-S G811) in home health services (NAICS 6216) <b>(J)</b>                                                                     | 26,300                    |                                                                                                                                                                                                                                                                                                                      | 5%                                                                                                                      | 26,300x5%                                 | 1,300                              |                                    |                                                                                                                                  |
| <b>HOME CARE WORKERS (REGISTERED NURSES (RNS) AND LICENSED PRACTICAL NURSES (LPNS))</b><br>IN COMMUNITY | All direct care nurses in home care <b>(E,F)</b>                                                                                                          | 14,200                    |                                                                                                                                                                                                                                                                                                                      | 10% of home care clients are living with cancer; 1% or fewer receive chemotherapy treatment at a given time <b>(18)</b> | 5%                                        | 14,200x5%                          |                                    |                                                                                                                                  |
| <b>LAUNDRY WORKERS</b><br>IN HOSPITALS                                                                  | All laundry workers (NOC-S code G981) employed in hospitals (NAICS 6220) <b>(J)</b>                                                                       | 2,700                     | Antineoplastic agents are handled in most Canadian hospital facilities <b>(3)</b><br><br>Approximately 25-35% of laundry workers are in soiled laundry sorting areas <b>(19)</b><br><br>Exposure may occur via handling of contaminated linens <b>(20)</b>                                                           | 20%                                                                                                                     | 2,700x20%                                 | 500                                | <b>J</b>                           | N/A                                                                                                                              |
| <b>LAUNDRY WORKERS</b><br>IN 1) GERIATRIC / LONG TERM CARE<br>2) SUB-CONTRACTOR FACILITIES              | All laundry workers (NOC-S G981) employed in nursing and residential care facilities (NAICS 6230) and in private laundry services (NAICS 8123) <b>(J)</b> | 13,400                    | 1.8% of individuals in hospital continuing care and <1% in residential care receive chemotherapy <b>(7)</b><br><br>Linen contamination has been detected in private laundry facilities <b>(17,21)</b>                                                                                                                | 2%                                                                                                                      | 13,400x2%                                 | 300                                |                                    |                                                                                                                                  |
| <b>PHYSICIAN SPECIALISTS</b><br>IN HOSPITALS                                                            | All medical oncologists, gynecologic oncologists <b>(K)</b>                                                                                               | 500                       | Exposure prevalence of physicians specializing in medical or gynaecologic oncology reflects proportion used for oncology nurses<br><br>Lower exposure prevalence of 25% used to address uncertainty in location of practice (e.g., oncology vs. non-oncology haematology)                                            | 75%                                                                                                                     | 500x75%                                   | 400                                | <b>K</b>                           | Other medical doctors who may contact antineoplastic agents (patients or contaminated surfaces) through the course of their work |
|                                                                                                         | Other relevant specialists (haematologists and paediatric haematologists) <b>(K)</b>                                                                      | 500                       |                                                                                                                                                                                                                                                                                                                      | 25%                                                                                                                     | 500x25%                                   | 100                                |                                    |                                                                                                                                  |

**NAICS** = North American Industrial Classification System, 2002, **NOC-S** = National Occupation Classification System, 2006

<sup>1</sup>Where occupations are grouped, numbers may not reflect proportion applied

<sup>2</sup>Occupations excluded due to insufficient data

<sup>3</sup>Individual provincial/territorial veterinary associations (n=12) were also consulted on a case-by-case basis

## REFERENCES (Baseline Populations and Sex Breakdowns)

**A:** Canadian Institute for Health Information. (2015). Pharmacists in Canada, 2014. Ottawa, Canada.

**B:** Ordre des pharmaciens du Québec. (2015). Rapport Annuel, 2014-2015. Montréal, Canada.

**C:** Hospital Pharmacy in Canada Editorial Board. (2015). Hospital Pharmacy in Canada 2013/2014 Report. Canada.

**D:** Canadian Pharmacists Association. (2007). Pharmacy Human Resources for the Future. The Pharmacy Technician Workforce in Canada: Roles, Demographics and Attitudes. Ottawa, Canada

**E:** Canadian Institute for Health Information (CIHI). (2015). Regulated Nurses, 2014. Ottawa, Canada.

**F:** College of Nurses of Ontario. (2014). Nursing Employment Positions Report. Toronto, Canada.

**G:** Canadian Veterinary Medical Association. (2013). Online Veterinary Statistics. Ottawa, Canada.

**H:** Poole A, Shane S, Kearney M, Rehn W. (1998). Survey of occupational hazards in companion animal practices. Journal of the American Veterinary Medical Association, 212(9):1386-88.

**I:** Canadian Association of Animal Health Technologists and Technicians. (2004). Canadian Association of Animal Health Technologists/Technicians Survey 2002-2003. Kemptville, Canada.

**J:** Statistics Canada. (2006). 2006 Census of Population. Ottawa, Canada.

**K:** The Canadian Medical Association. (2015). Physician Statistics. Ottawa, Canada.

**L:** Canadian Institute for Health Information (2013). Pharmacist Workforce, 2012. Ottawa, Canada.

**M:** Canadian Healthcare Association. Home Care in Canada: From the Margins to the Mainstream. Ottawa, ON; 2009.

## REFERENCES (Exposure Proportions)

**1)** Abbott, R., Edwards, S., Whelan, M., Edwards, J., & Dranitsaris, G. (2014). Are community pharmacists equipped to ensure the safe use of oral anticancer therapy in the community setting? Results of a cross-country survey of community pharmacists in Canada. Journal of Oncology Pharmacy Practice: Official Publication of the International Society of Oncology Pharmacy Practitioners, 20(1), 29–39.

**2)** O’Bryant, C. L., & Crandell, B. C. (2008). Community pharmacists’ knowledge of and attitudes toward oral chemotherapy. Journal of the American Pharmacists Association, 48(5), 632–9.

**3)** Hospital Pharmacy in Canada Editorial Board. (2015). Hospital Pharmacy in Canada 2013/2014 Report. Canada.

**4)** Hon, C.-Y., Teschke, K., Chu, W., Demers, P., & Venners, S. (2013). Antineoplastic drug contamination of surfaces throughout the hospital medication system in Canadian hospitals. Journal of Occupational and Environmental Hygiene, 10(7), 374–83.

**5)** Ward, H. D., Teschke, K., Ratner, P., Le, N., Spinelli, J., & Gallagher, R. (2006). A Retrospective Cohort Study of Mortality and Cancer Incidence among Registered Nurses in British Columbia (Report to WorkSafeBC). Vancouver, Canada.

**6)** Dimich-Ward, H., Lorenzi, M., Teschke, K., Spinelli, J. J., Ratner, P. A., Le, N. D., ... Gallagher, R. P. (2007). Mortality and cancer incidence in a cohort of registered nurses from British Columbia, Canada. American Journal of Industrial Medicine, 50(12), 892–900.

**7)** Canadian Institute for Health Information (CIHI). (2015). Continuing Care Reporting System (CCRS) Profile of Residents in Hospital-based Continuing Care 2014-2015. Ottawa, Canada.

**8)** Elliot, K. M., & Mayer, M. N. (2009). Cancer treatment therapies. The Canadian Veterinary Journal. La Revue Vétérinaire Canadienne, 50(7), 771-2.

**9)** Couch, J., Gibbins, J., & Connor, T. H. (2013). Evaluation of Chemotherapy Drug Exposure at a Veterinary Teaching Hospital in Michigan. Journal of Occupational and Environmental Hygiene, 10(4), D45-D51.

**10)** Meijster, T., Fransman, W., Veldhof, R., & Kromhout, H. (2006). Exposure to antineoplastic drugs outside the hospital environment. The Annals of Occupational Hygiene, 50(7), 657–64.

**11)** Epp, T., & Waldner, C. (2012). Occupational health hazards in veterinary medicine: physical, psychological, and chemical hazards. The Canadian Veterinary Journal, 53(2), 151-7.

**12)** Soest, E. van, & Fritschi, L. (2004). Occupational health risks in veterinary nursing: an exploratory study. Australian Veterinary Journal, 82(6), 346–350.

**13)** Cave, T., Norman, P., & Mellor, D. (2007). Cytotoxic drug use in treatment of dogs and cats with cancer by UK veterinary practices (2003 to 2004). The Journal of Small Animal Practice, 48(7), 371–7.

**14)** Personal Communication (January 2016). Provincial environmental services technical team, British Columbia, Canada.

**15)** Home Care Sector Study Corporation. (2003). Canadian home care human resources study: Technical report. Canada.

**16)** Yuki, M., Takase, K., Sekine, S., & Ishida, T. (2014). Evaluation of surface contamination with cyclophosphamide in the home setting of outpatients on cancer chemotherapy. Journal of Nursing Education and Practice, 4(10), 16-23.

**17)** Böhlandt, A., Sverdel, Y., & Schierl, R. (2017). Antineoplastic drug residues inside homes of chemotherapy patients. International Journal of Hygiene and Environmental Health, In Press. <http://doi.org/10.1016/j.ijheh.2017.03.005>

**18)** Canadian Institute for Health Information (CIHI). (2015). Home Care Reporting System (HCRS) Profile of Clients in Home Care, 2014–2015. Ottawa, Canada.

**19)** Personal Communication (February 2016). A. Griffiths, Vancouver Island Health Authority, British Columbia, Canada.

**20)** Fransman, W., Vermeulen, R., & Kromhout, H. (2005). Dermal exposure to cyclophosphamide in hospitals during preparation, nursing and cleaning activities. International Archives of Occupational and Environmental Health, 78(5), 403–12.

**21)** Fransman, W., Huizer, D., Tuerk, J., & Kromhout, H. (2007). Inhalation and dermal exposure to eight antineoplastic drugs in an industrial laundry facility. International Archives of Occupational and Environmental Health, 80(5), 396–403.

## EXPOSURE DEFINITION

| PHARMACY WORKERS (Pharmacists and Pharmacy Technicians)       |
|---------------------------------------------------------------|
| Preparing antineoplastic agents (any type)                    |
| AND/OR                                                        |
| Contact with contaminated surfaces                            |
| NURSES (Registered Nurses and Licensd Practical Nurses)       |
| Administering antineoplastic agents (any type)                |
| AND/OR                                                        |
| Contact with individuals receiving antineoplastic agents      |
| AND/OR                                                        |
| Contact with contaminated surfaces or fluids                  |
| VETERINARY WORKERS (Veterinarians and Veterinary Technicians) |
| Preparing antineoplastic agents (any type)                    |
| AND/OR                                                        |
| Administering antineoplastic agents (any type)                |
| AND/OR                                                        |
| Contact with individuals receiving antineoplastic agents      |
| AND/OR                                                        |
| Contact with contaminated surfaces or fluids                  |
| CLEANING WORKERS                                              |
| Contact with contaminated surfaces or fluids                  |
| AND/OR                                                        |
| Contact with contaminated linens                              |
| HOME CARE WORKERS (Home Support Workers and Nurse Aides)      |
| Administering antineoplastic agents (any type)                |
| AND/OR                                                        |
| Contact with individuals receiving antineoplastic agents      |
| AND/OR                                                        |
| Contact with contaminated surfaces or fluids                  |
| LAUNDRY WORKERS                                               |
| Contact with contaminated linens                              |
| PHYSICIAN SPECIALISTS                                         |
| Contact with individuals receiving antineoplastic agents      |
| AND/OR                                                        |
| Contact with contaminated surfaces or fluids                  |
